# Supplementary material for: Coordination of pertechnetate [TcO4]? to actinides
Source: Royal Society of Chemistry journal article supplement (doi:10.1039/b404424j), 2004-01-01
Supplement: b404424j.doc [file b404424j.doc]

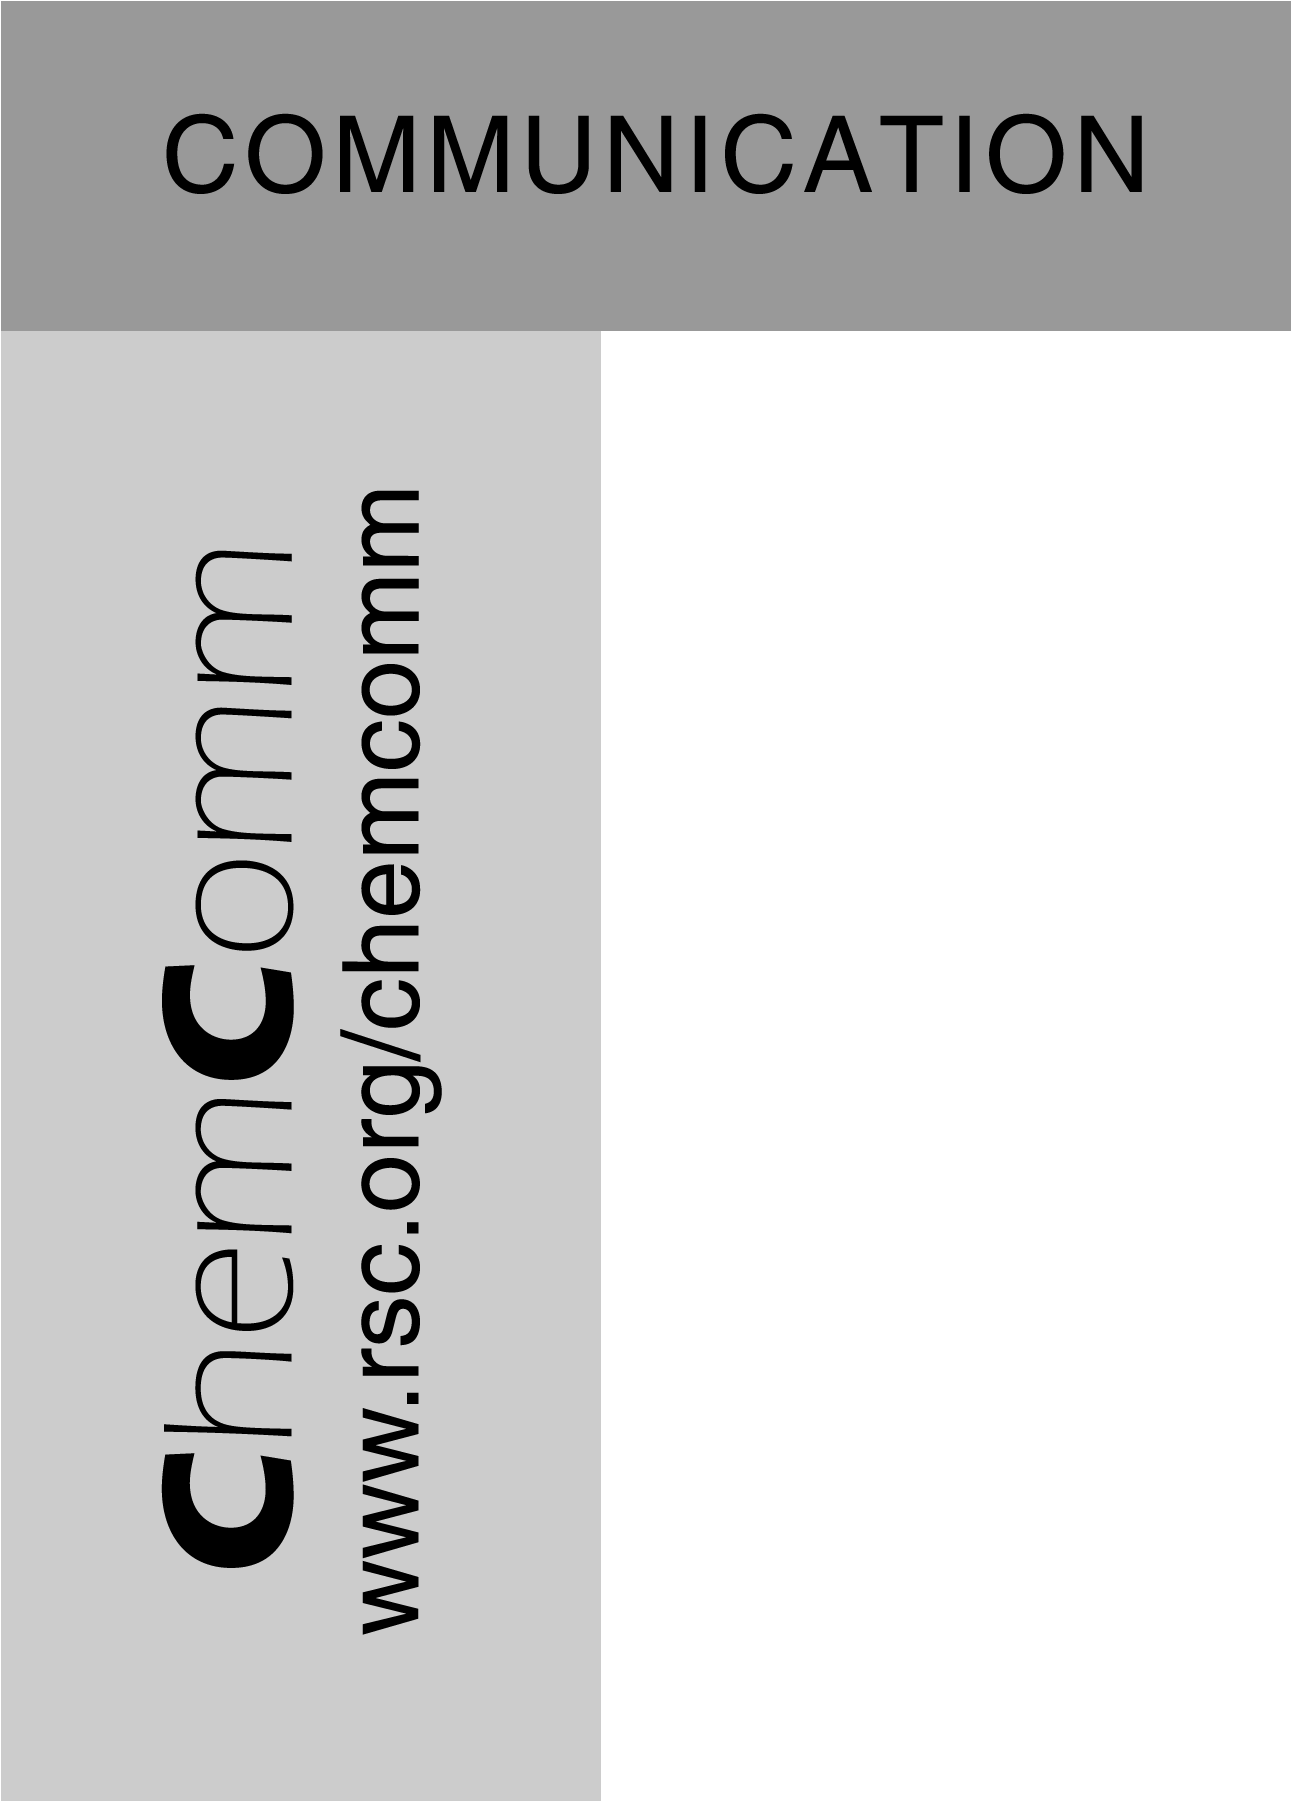
Coordination of pertechnetate [TcO4]- to actinides

Mark J. Sarsfield,**a* Andrew D. Sutton,*a* Iain May,*a* Gordon H. John,*a* Clint Sharrad*a* and Madeleine Helliwell*b*

**Electronic Supporting Information**

**Synthesis of AgTcO4**

An aqueous solution of AgNO3 (0.500 ml, 102 mg, 0.600 mmol) was added to a 0.8M NH4OH solution of NH4TcO4 (1.20 ml, 108 mg, 0.600 mmol) and stirred for approximately 1 hour at *ca.* 0 oC to ensure precipitation of yellow AgTcO4. The solid was allowed to settle and formed a dense precipitate. The supernatent was decanted and the solid washed with water (2 x 0.50 ml) and then allowed to dry in air overnight. Yield = 127 mg, 0.468 mmol, 78 %. AgTcO4 was then recrystalised from hot water.

**Synthesis of [UO2(TcO4)2(TPPO)3] (1)**

UO2Cl2(TPPO)2 (31.4 mg, 0.035 mmol) was dissolved in MeOH (1 ml) and added to a suspension of AgTcO4 (19 mg, 0.070mmol) in MeOH (2 ml). The sample was stirred for approximately one hour and centrifuged (3500 rpm, 5 min). The solution was then filtered from the solid AgCl using a syringe filter. Single crystals suitable for X-ray diffraction were grown from methanol at *ca.* 4 oC after 2 months.

**Synthesis of [Th(TcO4)4].xH2O**

AgTcO4 (78.6 mg, 0.290 mmol) was dissolved in deionised water (30 ml) and an aqueous solution of ThCl4 (8.01 x 10-2 M) was added dropwise yielding AgCl and Th(TcO4)4. A Ag+ selective electrode (Cole and Palmer) was used to monitor the presence of Ag+ ions in solution to determine the equivalence point for the formation of pure Th(TcO4)4. The solution was filtered to remove the solid AgCl using a syringe filter and evaporated to near dryness under a heat lamp. To prevent thermal decomposition of the complex, it was then placed in a desicator to yield a dry solid product (63.5 mg, 99 % yield).

**Synthesis of [Th(TcO4)4(TBPO)4] (2)**

A solution of Th(TcO4)4 in MeOH (1.0 ml, 4.0 mg Tc, 4.04 x 10-3 mmol) was added to TBPO (10.4 mg, 4.80 x 10-3 mmol) in MeOH (1.0 ml) to form a white precipitate. The sample was centrifuged (3500 rpm, 1 min) and the clear solution decanted. The remaining solid was redissolved in dichloromethane and was stored overnight at 4 oC to yield clear block crystals suitable for X-ray crystallography (55.0 mg, 77 % yield).

IR (blue) and Raman (red) spectra of [UO2(TcO4)2(Ph3PO)3] (**1**)

IR (blue) and Raman (red) spectra of [Th(TcO4)4(nBu3PO)4] (**2**)


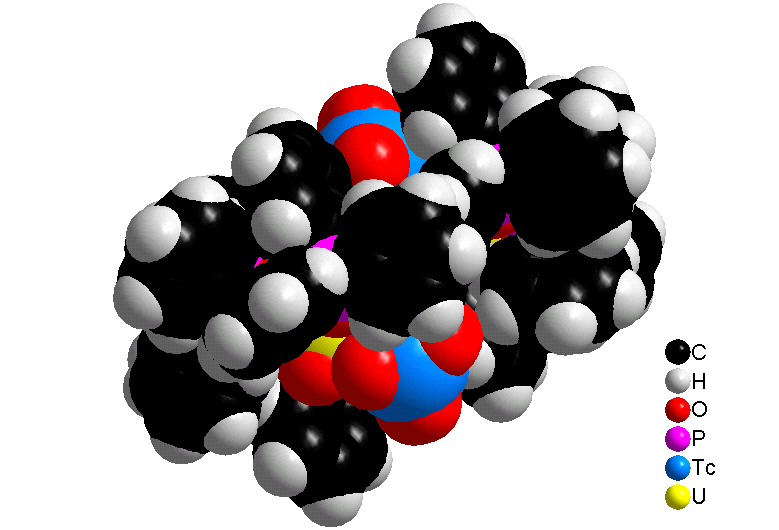


Space filling diagram for 2 molecules of [UO2(TcO4)2(TPPO)3] (**1**) in the unit cell.

Variable temperature (188-298 K) 99Tc NMR spectrum (90.06 MHz, 512 scans) for [UO2(TcO4)2(TPPO)3] (**1**) in CD2Cl2.

Variable temperature (188-298 K) 31P NMR spectrum (162 MHz, 256 scans) for [UO2(TcO4)2(TPPO)3] (**1**)in CD2Cl2.

Variable temperature (208-298 K) 31P NMR spectrum (162 MHz, 256 scans) for [Th(ReO4)4(TBPO)4] (**2**) in CD2Cl2.

Variable temperature (208-298 K) 99Tc NMR spectrum (90.08 MHz, 512 scans) for [Th(ReO4)4(TBPO)4] (**2**) in CD2Cl2.
